# Supplementary material for: A sustainable waste plastic valorisation: conversion of discarded polyurethane into an active micro-cleaner using a DES system
Source: Royal Society of Chemistry journal article supplement (doi:10.1039/d3gc03148a), 2023-01-01
Supplement: d3gc03148a1.pdf [file d3gc03148a1.pdf]

## Electronic supplementary Information (ESI)

### A sustainable waste plastic valorisation: Conversion of discarded polyurethane into active micro-cleaner using DES system

Ashok Shrishail Maraddi,<sup>a</sup> Manohara Halanur Mruthunjayappa,<sup>a</sup> Smitha V. Kamath,<sup>a</sup> Glenita D'Souza,<sup>a</sup> Hyeonseok Yoon<sup>b\*</sup> and S. K. Nataraj<sup>a,b\*</sup>

<sup>a</sup>Centre for Nano and Material Sciences, Jain University, Jain Global Campus, Bengaluru, 562112, Karnataka, India

<sup>b</sup>School of Polymer Science and Engineering, Chonnam National University, 77 Yongbong-ro, Buk-gu, Gwangju 61186, South Korea.

\*Corresponding Author: (SKN) [sk.nataraj@jainuniversity.ac.in](mailto:sk.nataraj@jainuniversity.ac.in); [sk.nata@gmail.com](mailto:sk.nata@gmail.com)

(HY): [hyoon@chonnam.ac.kr](mailto:hyoon@chonnam.ac.kr)

**Table s1:** Material code and composition of their reaction mass

| Code  | Material in g | DES (CC-FeCl <sub>3</sub> ) in mL | Water in mL | % of DES | Reaction duration | Temp in °C | % Yield |
|-------|---------------|-----------------------------------|-------------|----------|-------------------|------------|---------|
| PUC-0 | 3g PU         | 00                                | 16          | 0        | 12h               | 180        | --      |
| PUC-1 | 3g PU         | 00                                | 16          | 0        | 12h               | 200        | 35      |
| PUC-2 | 3g PU         | 12                                | 4           | 75       | 12h               | 200        | 33      |
| PUC-3 | 3g PU         | 16                                | 0           | 100      | 12h               | 200        | 34      |

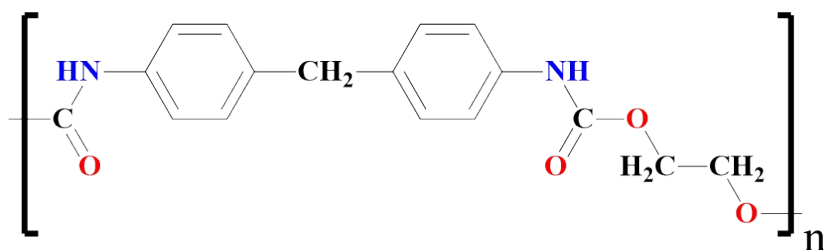

Scheme s1: Chemical structure of the polyurethane

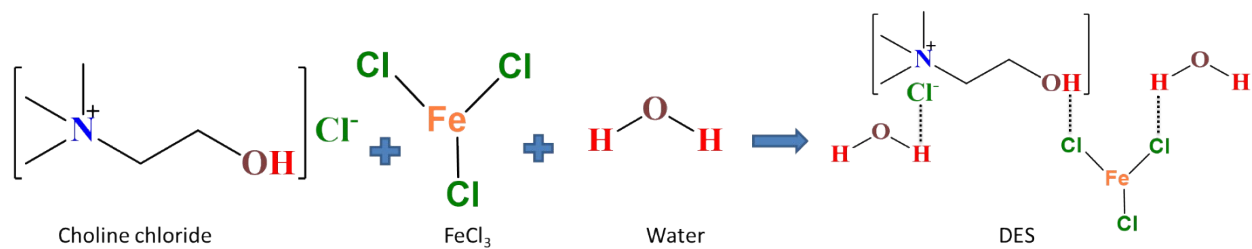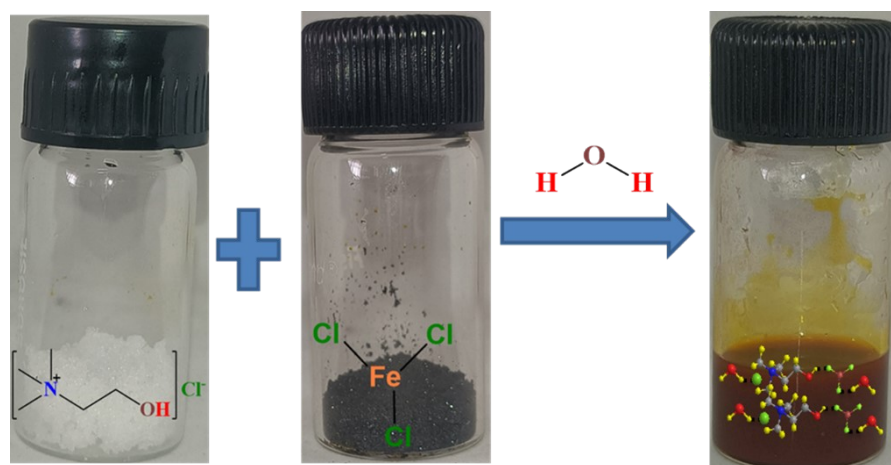

Scheme s2: Pictorial representation and reaction scheme of the DES preparation

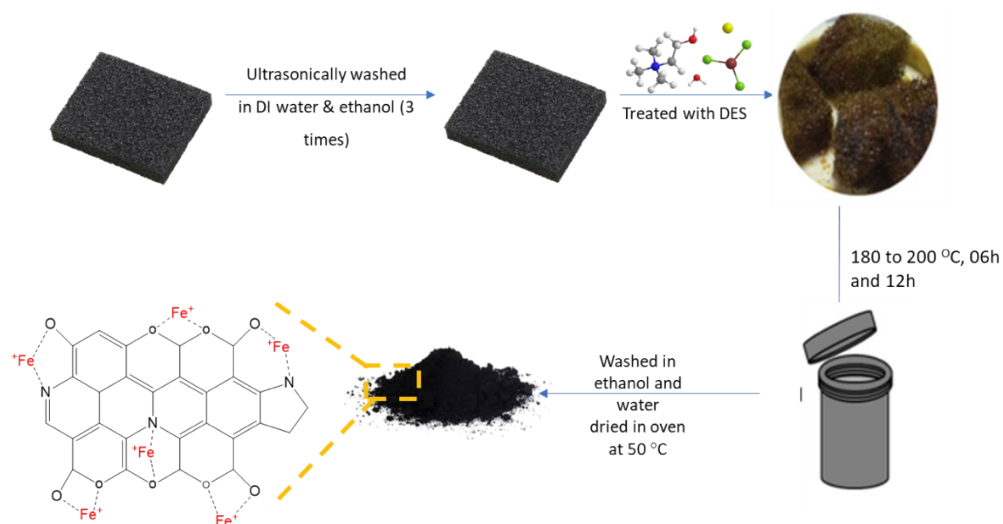

Scheme s3: Schematic representation of the preparation of the active micro cleaners

**Table S2:** Detail of the contaminants

| Sl no | Dye structure                                                                                            | Mol wt<br>Mol/g                                                               | Charge      | $\lambda_{\max}$<br>in nm |
|-------|----------------------------------------------------------------------------------------------------------|-------------------------------------------------------------------------------|-------------|---------------------------|
| 1     | <p>Malachite Green</p> 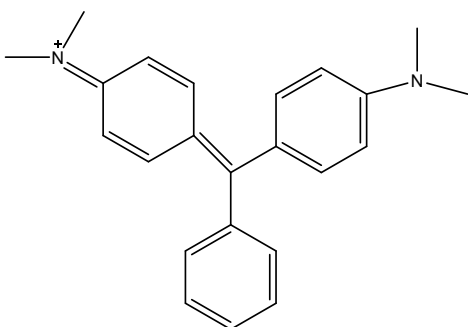 | 364.8<br>(C <sub>23</sub> H <sub>25</sub> ClN <sub>2</sub> )                  | +           | 617                       |
| 2     | <p>Methylene Blue</p>  | 319.85<br>(C <sub>16</sub> H <sub>18</sub> ClN <sub>3</sub> S)                | +           | 665                       |
| 3     | <p>Ciprofloxacin</p>  | 331.34<br>(C <sub>17</sub> H <sub>19</sub> ClFN <sub>3</sub> O <sub>3</sub> ) | Zwitter ion | 276                       |

**Table S3:** BET Surface area, pore volume and pore diameter of the materials.

| Sl. no. | Sample code | Surface area<br>(m <sup>2</sup> g <sup>-1</sup> ) | Pore volume<br>(cm <sup>3</sup> g <sup>-1</sup> ) | Pore diameter<br>(nm) |
|---------|-------------|---------------------------------------------------|---------------------------------------------------|-----------------------|
| 1       | PUC-1       | 2.2609                                            | 0.00045041                                        | 0.7968                |
| 2       | PUC-2       | 9.9629                                            | 0.014808                                          | 5.9451                |
| 3       | PUC-3       | 2.0138                                            | 0.0012703                                         | 2.5233                |

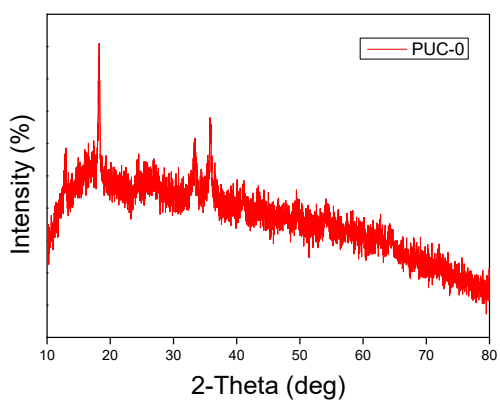

Figure s1: XRD data of PUC-0.

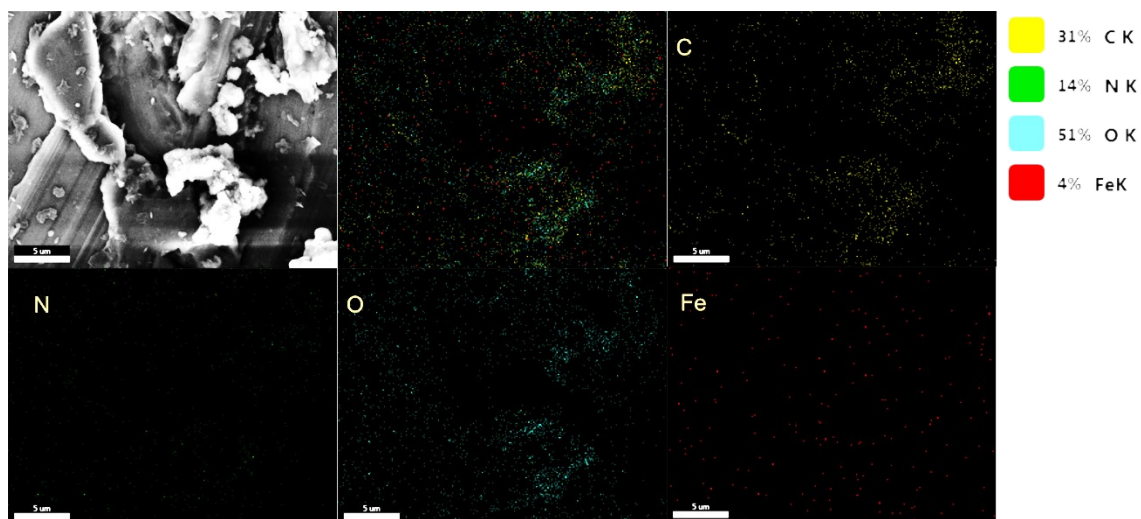

Figure-s2: EDAX mapping of the PUC-2 active micro cleaner

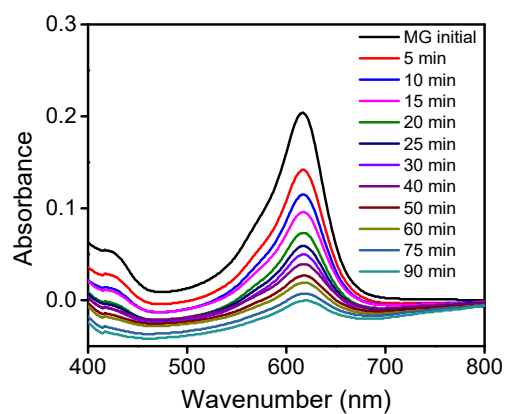

Figure-s3: UV spectra of the time dependent study PUC-3 active microcleanser

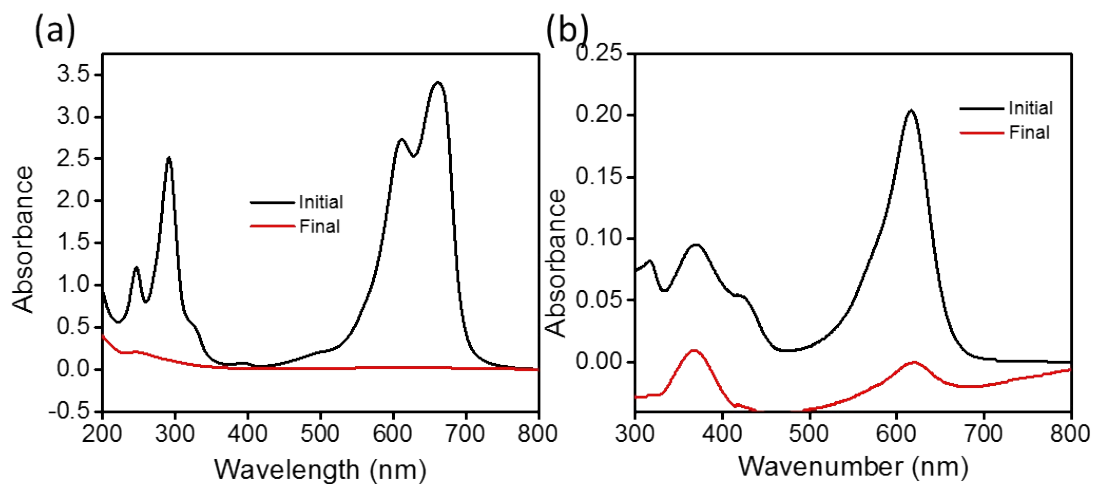

Figure-s4: Uv spectra of the (a) MB dye (b) MG dye

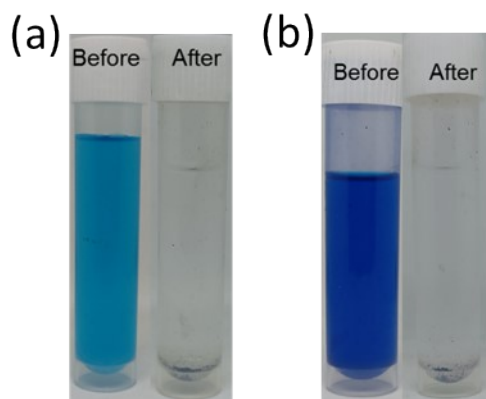

Figure-s5: Photographic images of the (a) MG dye before and after, (b) MB dye before and after

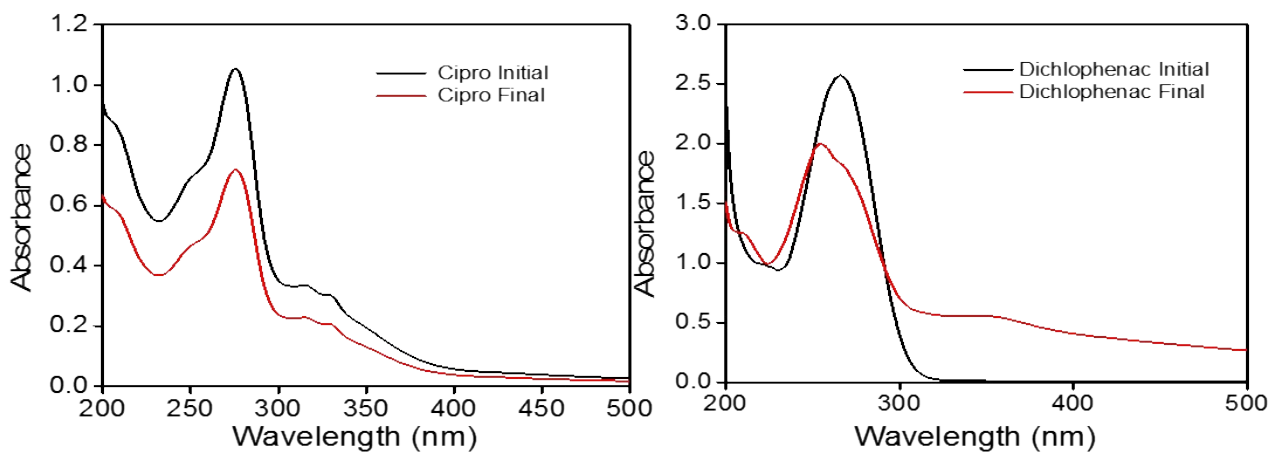

Figure-s6: UV spectra of the (a) ciprofloxacin (b) Dichlophenac

### Section s1: Mechanisms of photo-Fenton self-cleaning

On the basis of the above results, an overview of possible mechanisms of photo-Fenton self-cleaning was described in following reaction process

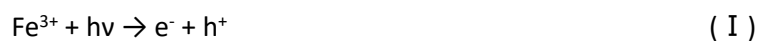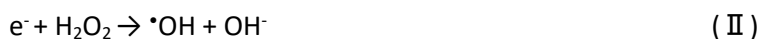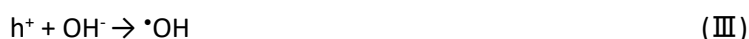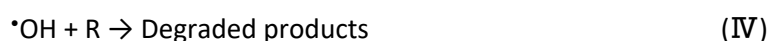

In detail,  $\text{Fe}^{3+}$  is first excited and generated photo generated electrons ( $e^-$ ) and holes ( $h^+$ ) under Sunlight, which will trigger a series of reactions for the degradation of dye foulants (R). Subsequently, the  $e^-$  could be transferred to the  $\text{Fe}^{3+}$  surface reacting with  $\text{H}_2\text{O}_2$  to form the  $\bullet\text{OH}$  radicals. In addition, the  $h^+$  on the valence band of  $\text{Fe}^{3+}$  also reacts with  $\text{OH}^-$  to generate  $\bullet\text{OH}$  radical. The strong oxidizing and non-selective  $\bullet\text{OH}$  radicals can readily decompose dye foulants into  $\text{H}_2\text{O}$  and  $\text{CO}_2$  completely. The excellent photo-Fenton self-cleaning performance of the PUC-2 membrane shows promising prospect in dye separation. In MB dye degradation initially, the  $\text{OH}\bullet$  and  $\text{O}_2\bullet$  radicals produced by the photo-Fenton reaction could destroy the chromophore center of the MG molecule by demethylation cleavage and release, leading to the formation of small molecules. Finally destroy the aromatic ring intermediate leading into the small molecules.

**Table s4: Comparison table with active micro cleaner.**

| Material  | Contaminates     | Adsorption Conditions | Adsorption Isotherm Model | Adsorption Kinetics | Maximum Adsorption Capacity, $\text{mg}\cdot\text{g}^{-1}$ | References |
|-----------|------------------|-----------------------|---------------------------|---------------------|------------------------------------------------------------|------------|
| STC-2     | MG               | pH=7                  | Freundlich                | Pseudo Second Order | 689                                                        | 1          |
| C- HCS    | RhB              | pH=7                  | Langmuir                  | Pseudo Second Order | 105.3                                                      | 2          |
| HM-CFB-FA | $\text{Cd}^{2+}$ | pH=7                  | Langmuir                  | Pseudo Second Order | 183.7                                                      | 3          |
| MNSBC     | TC               | pH=7                  | Langmuir                  | Pseudo Second Order | --                                                         | 4          |

|                                        |          |                     |          |                     |            |                     |
|----------------------------------------|----------|---------------------|----------|---------------------|------------|---------------------|
| <b>Rice straw hydrochars</b>           | CR       | pH=7                | Langmuir | Pseudo Second Order | 222.1      | 5                   |
| <b>Mn<sub>3</sub>O<sub>4</sub>/AHC</b> | MB       | pH = 7<br>T = 298 K | Langmuir | Pseudo Second Order | 113.37     | 6                   |
| <b>PUC-2</b>                           | MG<br>MB | pH = 7<br>T = 298 K | Langmuir | Pseudo Second Order | 144<br>128 | <b>Present work</b> |

In this work, we compared with different hydrothermal prepared active microcleaners and their performance described in the literature (Table s3). One such study by Manohar et al. used the Solvothermal approach in conjunction with a glucose-based eutectic system and FeSO<sub>4</sub>. The synthesised compound exhibited a 689.7 mg g<sup>-1</sup> adsorptive capacity. According to Wu et al., a straightforward hydrothermal carbonization process was used to manufacture cassava slag biochar from agricultural waste cassava slag. removed 96% of Rhodamine B from an aqueous solution; the largest amount of Rhodamine B that could be adsorbed was 105.3 mg.g<sup>-12</sup>. In another study, Qiu et al. used hydrothermally modified CFB fly ash as an adsorbent material to remove Cd<sup>2+</sup> from wastewater. The maximum amount of Cd<sup>2+</sup> that could be absorbed was 183.7 mg/g<sup>3</sup>. According to Ma et al., simple one-pot hydrothermal technology was used for the first time to create Magnetic N-doped sludge biochar (MNSBC). MNSBC has a maximum adsorption capacity of 197.3 mg/g at 298 K<sup>4</sup>. According to Li et al., a microwave-assisted hydrothermal treatment method was used to manufacture a number of rice straw hydrochars. Congo red has a maximum adsorption capacity of 222.1 mg.g<sup>-1</sup><sup>5</sup>. According to Smitha et al., a more environmentally friendly solvothermal approach was used to create functional carbon helices (HTCs) that resemble tendrils using the deadly bio-weed Parthenium hysterophorus as the carbon source. a strong Mn<sub>3</sub>O<sub>4</sub>/AHC composite with 113 mg g<sup>-1</sup> of MG dye adsorption capability<sup>6</sup>.

## References:

1. S. Chakraborty, K. Aruchamy, D. Ghosh, N. Singh, K. Prasad, D. Kalpana, & Mondal, D. *Journal of Materials Chemistry A*, 2019, **7(9)**, 4988-4997.
2. J. Wu, J. Yang, G. Huang, C. Xu and B. Lin, *Journal of Cleaner Production*, 2020, **251**, 110717.
3. R. Qiu, F. Cheng and H. Huang, *Journal of Cleaner Production*, 2018, **172**, 1918-1927.
4. Y. Ma, T. Lu, J. Tang, P. Li, O. Mašek, L. Yang, L. Wu, L. He, Y. Ding, F. Gao, X. Qi and Z. Zhang, *Separation and Purification Technology*, 2022, **297**, 121426.
5. Y. Li, N. Tsend, T. Li, H. Liu, R. Yang, X. Gai, H. Wang and S. Shan, *Bioresource Technology*, 2019, **273**, 136-143.
6. S. V. Kamath, H. M. Manohara, K. Aruchamy, A. S. Maraddi, G. B. D'Souza, K. N. Santhosh, K. N. Mahadevaprasad and S. K. Nataraj, *RSC Advances*, 2022, **12**, 9101-9111.
